# Supplementary material for: Defect dipole-induced domain reorientation of NdFeO3–PbTiO3 thin films
Source: Royal Society of Chemistry journal article supplement (doi:10.1039/c8qi00132d), 2018-01-01
Supplement: c8qi00132d1.pdf [file c8qi00132d1.pdf]

## Defect dipoles-induced domain reorientation of NdFeO<sub>3</sub>-PbTiO<sub>3</sub> thin films

Yilin Wang,<sup>1&</sup> Hanqing Zhao,<sup>2&</sup> Kun Lin,<sup>1</sup> Jinxia Deng,<sup>1</sup> Jun Chen,<sup>1</sup> and Xianran

Xing<sup>1\*</sup>

*1 Department of Physical Chemistry, University of Science and Technology Beijing, Beijing  
100083, China*

*2 Key Laboratory of Coal Science and Technology of Ministry of Education and Shanxi Province,  
Taiyuan University of Technology, Shanxi, 030024, China*

*& These authors contributed equally to this work.*

*\*E-mail: xing@ustb.edu.cn*

The lattice parameters of the NF-PT film were calculated on the peak values of (100) and (111) in the XRD pattern, which are both identifiable in the GI-XRD pattern. The values of  $a$  and  $c$  were calculated through the Bragg's Law:

$2d\sin\theta = n\lambda$ , where the  $\lambda = 1.5416$  nm.

And

$$d_{hkl} = \frac{1}{\sqrt{\left(\frac{h}{a}\right)^2 + \left(\frac{k}{b}\right)^2 + \left(\frac{l}{c}\right)^2}}$$

$$d_{111} = \frac{1}{\sqrt{\frac{2}{a^2} + \frac{1}{c^2}}}$$

As the film is tetragonal,  $a = b \neq c$ . Therefore,  $d_{100} = a$  and

The peak of the (100) is located at  $2\theta = 22.71^\circ$ . So,  $a = \lambda/2\sin\theta = 1.5416/(2\sin 11.35^\circ) = 3.9148$  Å.

The peak of the (111) is located at  $2\theta = 39.62^\circ$ .  $\frac{1}{\sqrt{\frac{2}{a^2} + \frac{1}{c^2}}} = 1.5416/(2\sin 19.81^\circ)$  and  $a = 3.9148$  Å. The value of  $c$  could be determined to be 4.0181 Å.
